# Supplementary material for: Metal-acid site synergistic catalysis in Ru–ZrO2 toward selective hydrogenation of benzene to cyclohexene
Source: Royal Society of Chemistry journal article supplement (doi:10.1039/c7cy01351e), 2017-11-20
Supplement: c7cy01351e1.pdf [file c7cy01351e1.pdf]

**The electronic supplementary information for**

**Metal-acid site synergistic catalysis in Ru–ZrO<sub>2</sub> toward selective  
hydrogenation of benzene to cyclohexene**

**Deming Rao,<sup>‡</sup> Xiaoge Xue,<sup>‡</sup> Guoqing Cui, Shan He, Ming Xu, Weihan Bing, Shuxian Shi\*  
and Min Wei\***

*State Key Laboratory of Chemical Resource Engineering, Beijing Advanced Innovation Center  
for Soft Matter Science and Engineering, Beijing University of Chemical Technology, Beijing  
100029, P. R. China*

\* Corresponding authors. Tel: +86-10-64412131; Fax: +86-10-64425385.

E-mail addresses: shisx@mail.buct.edu.cn (S. Shi); weimin@mail.buct.edu.cn (M. Wei).

<sup>‡</sup> These authors contributed equally to this work and should be considered as co-first authors.

## Computational details

Density functional theory (DFT),<sup>[1]</sup> as implemented in the Vienna ab initio Simulation Package (VASP),<sup>[2]</sup> was employed to perform the first-principles calculations. The DFT calculations were performed by using the electron projector-augmented wave methods<sup>[3]</sup> with the PBE generalized gradient approximation (GGA) exchange-correlation functional,<sup>[4]</sup> plus an on-site Zr d state U correction (DFT + U, or GGA + U).<sup>[5]</sup> The value of  $U = 4.0$  was applied for the Coulomb correction to the Zr 4d states, which was reported to well describe the electronic properties and defect states in crystalline Zirconium dioxide.<sup>[6-9]</sup> The  $\text{ZrO}_2(-111)$  surface and B-doped  $\text{ZrO}_2(-111)$  surface with  $p$  ( $2 \times 2$ ) supercells are cleaved according to the XRD patterns (Fig. 1 in main manuscript). A plane-wave cut-off of 400 eV was used. The Brillouin zone was sampled using a  $3 \times 3 \times 1$  Monkhorst-Pack  $k$ -point mesh.<sup>[10]</sup> Spin polarization was taken into account in all calculations for comparison. The adsorption energy ( $E_{\text{ad}}$ ) was defined as follows:

$$E_{\text{ad}} = E_{\text{total}} - (E_{\text{slab}} + E_{\text{adsorbate}}) \quad (1)$$

where  $E_{\text{total}}$  is the total energy of adsorbate-slab system;  $E_{\text{slab}}$  and  $E_{\text{adsorbate}}$  are the energies of the slab and the gas phase adsorbate, respectively. A negative value of  $E_{\text{ad}}$  corresponds to an exothermic process.

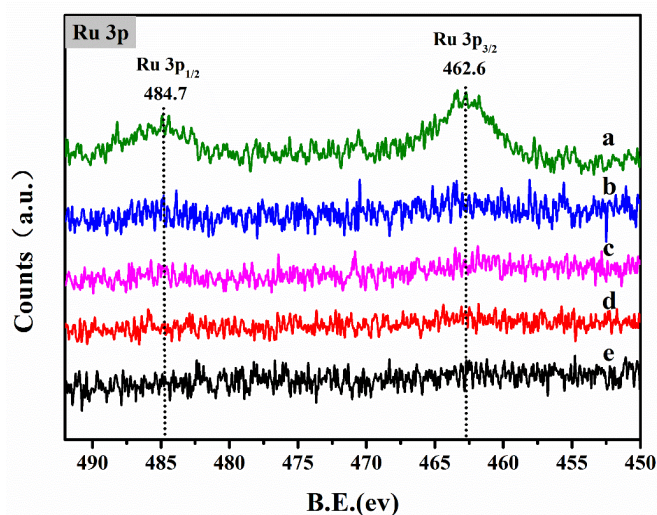

**Fig. S1** Ru 3p XPS spectra of (a) Ru/ZrO<sub>2</sub>, (b) Ru/ZrO<sub>2</sub>@ZrO<sub>2</sub>-B(0%), (c) Ru/ZrO<sub>2</sub>@ZrO<sub>2</sub>-B(5%), (d) Ru/ZrO<sub>2</sub>@ZrO<sub>2</sub>-B(10%) and (e) Ru/ZrO<sub>2</sub>@ZrO<sub>2</sub>-B(15%), respectively.

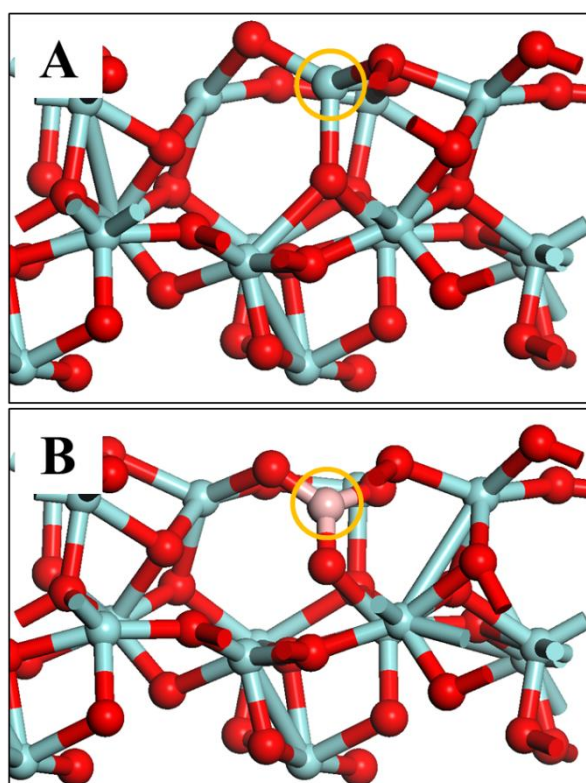

**Fig. S2** Sideview of (A) ZrO<sub>2</sub>(-111) and (B) B-ZrO<sub>2</sub>(-111) facet. The red, cyan and pink ball represents O, Zr and B atom, respectively. The doped B atom and its original position of Zr atom are encircled.

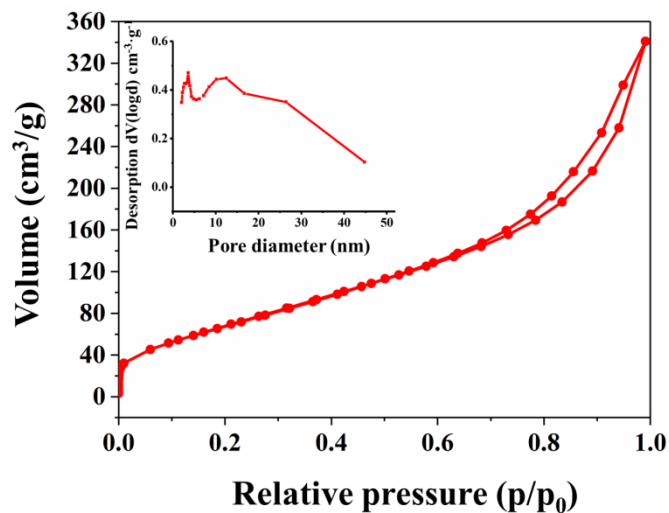

**Fig. S3** Nitrogen adsorption-desorption curves and the pore diameter distribution (inset) for the sample of Ru/ZrO<sub>2</sub>@ZrO<sub>2</sub>-B(5%).

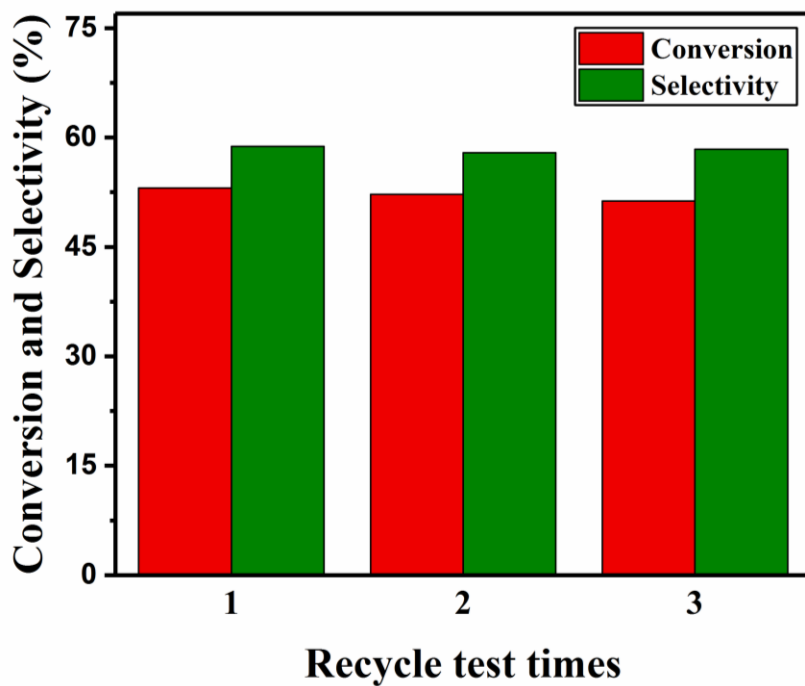

**Fig. S4** Catalytic performance of Ru/ZrO<sub>2</sub>@ZrO<sub>2</sub>(5%) in three consecutive recycles.

## Reference

- (1) W. Kohn and L. J. Sham, *Phys. Rev.*, 1965, **140**, 1133-1138.
- (2) G. Kresse and J. Furthmuller, *Phys. Rev. B: Condens. Matter Mater. Phys.*, 1996, **54**, 11169-11186.
- (3) P. E. Blochl, *Phys. Rev. B: Condens. Matter Mater. Phys.*, 1994, **50**, 17953-17979.
- (4) J. P. Perdew, K. Burke and M. Ernzerhof, *Phys. Rev. Lett.*, 1996, **77**, 3865-3868.
- (5) S. L. Dudarev, G. A. Botton, S. Y. Savrasov, C. J. Humphreys and A. P. Sutton, *Phys. Rev. B: Condens. Matter Mater. Phys.*, 1998, **57**, 1505-1509.
- (6) R. P. Antonio and P. Gianfranco, *Nanoscale*, 2017, **9**, 6866-6876.
- (7) S. Philomena, R. P. Antonio and P. Gianfranco, *Phys. Chem. Chem. Phys.*, 2015, **17**, 22342-22360.
- (8) T. C. Hsin-Yi, T. Sergio and P. Gianfranco, *Surf. Sci.*, 2016, **652**, 163-171.
- (9) T. C. Hsin-Yi, T. Sergio and P. Gianfranco, *ACS Catal.*, 2015, **5**, 5486-5495.
- (10) H. J. Monkhorst and J. D. Pack, *Phys. Rev. B*, 1976, **13**, 5188-5192.
